# Supplementary material for: Combining the power of DP4+ and ANN-PRA analysis on stereochemical assignments: structural validation of bioactive cyclic peroxide from the marine sponge Plakortis angulospiculatus
Source: Royal Society of Chemistry journal article supplement (doi:10.1039/d3nj01762a), 2023-01-01
Supplement: d3nj01762a1.pdf [file d3nj01762a1.pdf]

Combining the power of DP4+ and ANN-PRA analysis on  
stereochemical assignments: Structural validation of bioactive cyclic  
peroxide from the marine sponge *Plakortis angulospiculatus*.

Andrea N. L. Batista,<sup>a</sup> Lucas H. Martorano,<sup>a</sup> Alessandra L. Valverde<sup>\*a</sup> and Fernando M.  
dos Santos Jr.<sup>\*a</sup>

<sup>a</sup> Department of Organic Chemistry, Chemistry Institute, Fluminense Federal University, Outeiro de Sao Joao Batista  
s/n, Niteroi RJ 24020-141, Brazil.

\*E-mail: [alessandravalverde@id.uff.br](mailto:alessandravalverde@id.uff.br) and [fernando\\_martins@id.uff.br](mailto:fernando_martins@id.uff.br)

## Supplementary information

### Calculations:

Randomized conformational searches were performed for all the stereoisomers, using the Monte Carlo method and MMFF force field, in the Spartan'10 software package.<sup>1</sup> For isomer 1, 319 conformers with relative energy within 10 kcal mol<sup>-1</sup> of the lowest energy conformer were selected for further geometry optimized at the B3LYP/6-31G\* level. 59 conformers were identified with relative energy < 2.0 kcal mol<sup>-1</sup>, corresponding to more than 82% of the total Boltzmann distribution. For isomer 2, 334 conformers with relative energy within 10 kcal mol<sup>-1</sup> of the lowest energy conformer were selected for further geometry optimized at the B3LYP/6-31G\* level. 52 conformers were identified with relative energy < 2.0 kcal mol<sup>-1</sup>, corresponding to more than 87% of the total Boltzmann distribution. For isomer 3, 279 conformers with relative energy within 10 kcal mol<sup>-1</sup> of the lowest energy conformer were selected for further geometry optimized at the B3LYP/6-31G\* level. 94 conformers were identified with relative energy < 2.0 kcal mol<sup>-1</sup>, corresponding to more than 90% of the total Boltzmann distribution. For isomer 4, 156 conformers with relative energy within 10 kcal mol<sup>-1</sup> of the lowest energy conformer were selected for further geometry optimized at the B3LYP/6-31G\* level. 16 conformers were identified with relative energy < 2.0 kcal mol<sup>-1</sup>, corresponding

to more than 83% of the total Boltzmann distribution. For isomer 5, 84 conformers with relative energy within 10 kcal mol<sup>-1</sup> of the lowest energy conformer were selected for further geometry optimized at the B3LYP/6-31G\* level. 11 conformers were identified with relative energy < 2.0 kcal mol<sup>-1</sup>, corresponding to more than 85% of the total Boltzmann distribution. For isomer 6, 255 conformers with relative energy within 10 kcal mol<sup>-1</sup> of the lowest energy conformer were selected for further geometry optimized at the B3LYP/6-31G\* level. 55 conformers were identified with relative energy < 2.0 kcal mol<sup>-1</sup>, corresponding to more than 86% of the total Boltzmann distribution. For isomer 7, 96 conformers with relative energy within 10 kcal mol<sup>-1</sup> of the lowest energy conformer were selected for further geometry optimized at the B3LYP/6-31G\* level. 40 conformers were identified with relative energy < 2.0 kcal mol<sup>-1</sup>, corresponding to more than 91% of the total Boltzmann distribution. For isomer 8, 276 conformers with relative energy within 10 kcal mol<sup>-1</sup> of the lowest energy conformer were selected for further geometry optimized at the B3LYP/6-31G\* level. 20 conformers were identified with relative energy < 2.0 kcal mol<sup>-1</sup>, corresponding to more than 75% of the total Boltzmann distribution. For each selected structure, <sup>13</sup>C and <sup>1</sup>H NMR chemical shifts were calculated using the GIAO-mPW1PW91/6-31G(d)//B3LYP/6-31G(d)DFT approach, using the tetramethylsilane (TMS) as an internal reference, at the same level of theory. The Gaussian 09 software package was used.<sup>2</sup> The simulations were carried out either in the gas phase or chloroform solutions, using the polarizable continuum model (PCM) in its integral equation formalism version (IEFPCM) in Gaussian. In order to apply the DP4+ parameter, it was used the Excel spreadsheet provided by the authors.<sup>3</sup> For the application of the ANN-PRA method, NMR chemical shifts obtained at the same theoretical level as in the DP4+ method were used, following the instructions of ANN-PRA<sup>4</sup>, using the Excel spreadsheet provided by the authors at [sarotti-NMR.weebly.com](http://sarotti-NMR.weebly.com).

**Table S1:** Lowest energy conformers of isomer 1 of isolated compound at B3LYP/6-31G\* level.

**Figure S1:** The 9 lowest energy conformers of isomer 1 of isolated compound at B3LYP/6-31G\* level.

**Table S2:** Lowest energy conformers of isomer 2 of isolated compound at B3LYP/6-31G\* level.

**Figure S2:** The 9 lowest energy conformers of isomer 2 of isolated compound at B3LYP/6-31G\* level.

**Table S3:** Lowest energy conformers of isomer 3 of isolated compound at B3LYP/6-31G\* level.

**Figure S3:** The 9 lowest energy conformers of isomer 3 of isolated compound at B3LYP/6-31G\* level.

**Table S4:** Lowest energy conformers of isomer 4 of isolated compound at B3LYP/6-31G\* level.

**Figure S4:** The 9 lowest energy conformers of isomer 4 of isolated compound at B3LYP/6-31G\* level.

**Table S5:** Lowest energy conformers of isomer 5 of isolated compound at B3LYP/6-31G\* level.

**Figure S5:** The 9 lowest energy conformers of isomer 5 of isolated compound at B3LYP/6-31G\* level.

**Table S6:** Lowest energy conformers of isomer 6 of isolated compound at B3LYP/6-31G\* level.

**Figure S6:** The 9 lowest energy conformers of isomer 6 of isolated compound at B3LYP/6-31G\* level.

**Table S7:** Lowest energy conformers of isomer 7 of isolated compound at B3LYP/6-31G\* level.

**Figure S7:** The 9 lowest energy conformers of isomer 7 of isolated compound at B3LYP/6-31G\* level.

**Table S8:** Lowest energy conformers of isomer 8 of isolated compound at B3LYP/6-31G\* level.

**Figure S8:** The 9 lowest energy conformers of isomer 8 of isolated compound at B3LYP/6-31G\* level.

**Table S9:** Comparison of calculated  $\delta_{\text{scal}}$  (generalized scaling factor)  $^{13}\text{C}$  NMR chemical shifts simulated for the possible stereoisomers of **1** (GIAOmPW1PW91/6-31G(d)//B3LYP/6-31G(d)) with the experimental values ( $\delta_{\text{exp}}$ , 90.5 MHz,  $\text{CDCl}_3$ ) of the isolated natural product.

**Table S10** Comparison of calculated  $\delta_{\text{scal}}$  (internal scaling factor)  $^{13}\text{C}$  NMR chemical shifts simulated for the possible stereoisomers of **1** (GIAOmPW1PW91/6-31G(d)//B3LYP/6-31G(d)) with the experimental values ( $\delta_{\text{exp}}$ , 90.5 MHz,  $\text{CDCl}_3$ ) of the isolated natural product.

**Table S11:** Boltzmann averaged  $^{13}\text{C}$  GIAO isotropic magnetic shielding values calculates for all possible stereoisomers of **1** at mPW1PW91/6-31G(d)//B3LYP/6-31G(d).

**Table S12:** Boltzmann averaged  $^1\text{H}$  GIAO isotropic magnetic shielding values calculates for all possible stereoisomers of **1** at mPW1PW91/6-31G(d)//B3LYP/6-31G(d).

**Table S1:** Lowest energy conformers of isomer **1** of isolated compound at B3LYP/6-31G\* level.

| Conformers<br>isomer <b>1</b> | Rel.<br>Energy<br>(kcal/mol) | Boltzmann<br>population |
|-------------------------------|------------------------------|-------------------------|
| isomer1_conf1                 | 0.00                         | 12.73%                  |
| isomer1_conf2                 | 0.34                         | 7.21%                   |
| isomer1_conf3                 | 0.52                         | 5.28%                   |
| isomer1_conf4                 | 0.53                         | 5.19%                   |
| isomer1_conf5                 | 0.65                         | 4.25%                   |
| isomer1_conf6                 | 0.74                         | 3.65%                   |
| isomer1_conf7                 | 0.85                         | 3.01%                   |
| isomer1_conf8                 | 0.88                         | 2.88%                   |
| isomer1_conf9                 | 0.90                         | 2.78%                   |
| isomer1_conf10                | 0.94                         | 2.58%                   |
| isomer1_conf11                | 1.04                         | 2.20%                   |
| isomer1_conf12                | 1.04                         | 2.18%                   |
| isomer1_conf13                | 1.05                         | 2.16%                   |
| isomer1_conf14                | 1.05                         | 2.14%                   |
| isomer1_conf15                | 1.13                         | 1.89%                   |
| isomer1_conf16                | 1.19                         | 1.70%                   |
| isomer1_conf17                | 1.21                         | 1.65%                   |
| isomer1_conf18                | 1.23                         | 1.60%                   |
| isomer1_conf19                | 1.24                         | 1.56%                   |
| isomer1_conf20                | 1.25                         | 1.54%                   |
| isomer1_conf21                | 1.25                         | 1.54%                   |
| isomer1_conf22                | 1.26                         | 1.51%                   |
| isomer1_conf23                | 1.27                         | 1.49%                   |
| isomer1_conf24                | 1.31                         | 1.39%                   |
| isomer1_conf25                | 1.38                         | 1.23%                   |

|                |      |       |
|----------------|------|-------|
| isomer1_conf26 | 1.45 | 1.11% |
| isomer1_conf27 | 1.45 | 1.11% |
| isomer1_conf28 | 1.46 | 1.09% |
| isomer1_conf29 | 1.46 | 1.08% |
| isomer1_conf30 | 1.47 | 1.07% |
| isomer1_conf31 | 1.55 | 0.93% |
| isomer1_conf32 | 1.56 | 0.91% |
| isomer1_conf33 | 1.56 | 0.91% |
| isomer1_conf34 | 1.57 | 0.91% |
| isomer1_conf35 | 1.57 | 0.89% |
| isomer1_conf36 | 1.59 | 0.87% |
| isomer1_conf37 | 1.61 | 0.83% |
| isomer1_conf38 | 1.62 | 0.82% |
| isomer1_conf39 | 1.63 | 0.81% |
| isomer1_conf40 | 1.64 | 0.80% |
| isomer1_conf41 | 1.69 | 0.74% |
| isomer1_conf42 | 1.71 | 0.71% |
| isomer1_conf43 | 1.75 | 0.67% |
| isomer1_conf44 | 1.78 | 0.63% |
| isomer1_conf45 | 1.80 | 0.61% |
| isomer1_conf46 | 1.80 | 0.61% |
| isomer1_conf47 | 1.82 | 0.59% |
| isomer1_conf48 | 1.86 | 0.55% |
| isomer1_conf49 | 1.86 | 0.55% |
| isomer1_conf50 | 1.87 | 0.54% |
| isomer1_conf51 | 1.88 | 0.54% |
| isomer1_conf52 | 1.89 | 0.52% |
| isomer1_conf53 | 1.90 | 0.51% |
| isomer1_conf54 | 1.92 | 0.50% |
| isomer1_conf55 | 1.94 | 0.48% |
| isomer1_conf56 | 1.98 | 0.45% |
| isomer1_conf57 | 1.99 | 0.44% |
| isomer1_conf58 | 1.99 | 0.44% |
| isomer1_conf59 | 2.00 | 0.44% |

---

**Figure S1:** The 9 lowest energy conformers of isomer 1 of isolated compound at B3LYP/6-31G\* level.

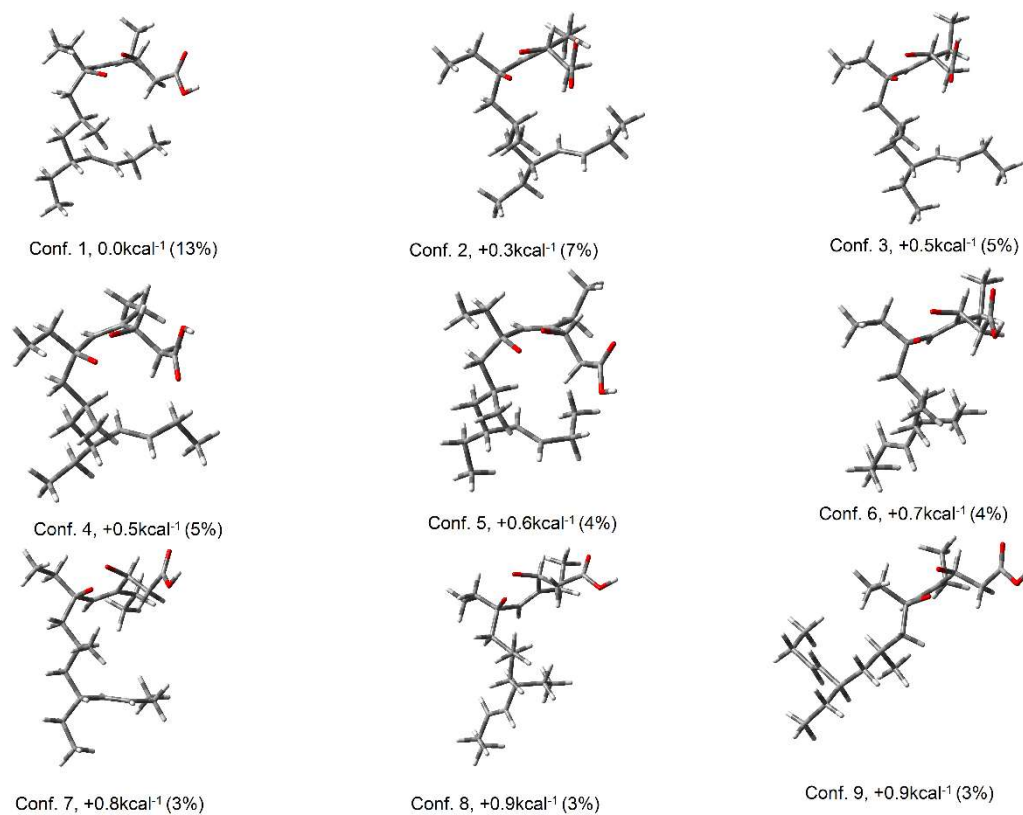

Isomer 1: 319 conformers with relative energy within 10 kcal mol<sup>-1</sup> of the lowest energy conformer were selected for further geometry optimized at the B3LYP/6-31G\* level. 59 conformers were identified with relative energy < 2.0 kcal mol<sup>-1</sup>, corresponding to more than 82% of the total Boltzmann distribution.

**Table S2:** Lowest energy conformers of isomer 2 of isolated compound at B3LYP/6-31G\* level.

| Conformers<br>isomer 2 | Rel.<br>Energy<br>(kcal/mol) | Boltzmann<br>population |
|------------------------|------------------------------|-------------------------|
| isomer2_conf1          | 0.00                         | 8.45%                   |
| isomer2_conf2          | 0.01                         | 8.33%                   |
| isomer2_conf3          | 0.12                         | 6.93%                   |
| isomer2_conf4          | 0.19                         | 6.10%                   |
| isomer2_conf5          | 0.25                         | 5.50%                   |
| isomer2_conf6          | 0.44                         | 4.00%                   |
| isomer2_conf7          | 0.49                         | 3.71%                   |
| isomer2_conf8          | 0.49                         | 3.68%                   |
| isomer2_conf9          | 0.55                         | 3.36%                   |
| isomer2_conf10         | 0.59                         | 3.10%                   |
| isomer2_conf11         | 0.63                         | 2.89%                   |
| isomer2_conf12         | 0.77                         | 2.30%                   |
| isomer2_conf13         | 0.77                         | 2.30%                   |
| isomer2_conf14         | 0.83                         | 2.09%                   |
| isomer2_conf15         | 0.84                         | 2.03%                   |
| isomer2_conf16         | 0.85                         | 2.03%                   |
| isomer2_conf17         | 0.87                         | 1.94%                   |
| isomer2_conf18         | 0.88                         | 1.92%                   |
| isomer2_conf19         | 0.92                         | 1.78%                   |
| isomer2_conf20         | 0.93                         | 1.77%                   |
| isomer2_conf21         | 0.95                         | 1.70%                   |
| isomer2_conf22         | 0.96                         | 1.67%                   |
| isomer2_conf23         | 0.96                         | 1.67%                   |
| isomer2_conf24         | 1.01                         | 1.52%                   |
| isomer2_conf25         | 1.05                         | 1.42%                   |
| isomer2_conf26         | 1.11                         | 1.30%                   |
| isomer2_conf27         | 1.14                         | 1.24%                   |
| isomer2_conf28         | 1.27                         | 0.99%                   |
| isomer2_conf29         | 1.30                         | 0.94%                   |
| isomer2_conf30         | 1.32                         | 0.91%                   |
| isomer2_conf31         | 1.35                         | 0.86%                   |
| isomer2_conf32         | 1.36                         | 0.85%                   |
| isomer2_conf33         | 1.39                         | 0.80%                   |
| isomer2_conf34         | 1.40                         | 0.80%                   |
| isomer2_conf35         | 1.42                         | 0.77%                   |
| isomer2_conf36         | 1.43                         | 0.76%                   |
| isomer2_conf37         | 1.45                         | 0.73%                   |
| isomer2_conf38         | 1.46                         | 0.72%                   |
| isomer2_conf39         | 1.48                         | 0.69%                   |
| isomer2_conf40         | 1.51                         | 0.66%                   |

|                |      |       |
|----------------|------|-------|
| isomer2_conf41 | 1.55 | 0.61% |
| isomer2_conf42 | 1.66 | 0.51% |
| isomer2_conf43 | 1.70 | 0.48% |
| isomer2_conf44 | 1.71 | 0.47% |
| isomer2_conf45 | 1.75 | 0.44% |
| isomer2_conf46 | 1.83 | 0.38% |
| isomer2_conf47 | 1.92 | 0.33% |
| isomer2_conf48 | 1.93 | 0.32% |
| isomer2_conf49 | 1.93 | 0.32% |
| isomer2_conf50 | 1.94 | 0.32% |
| isomer2_conf51 | 1.97 | 0.30% |
| isomer2_conf52 | 1.99 | 0.29% |

**Figure S2:** The 9 lowest energy conformers of isomer 2 of isolated compound at B3LYP/6-31G\* level.

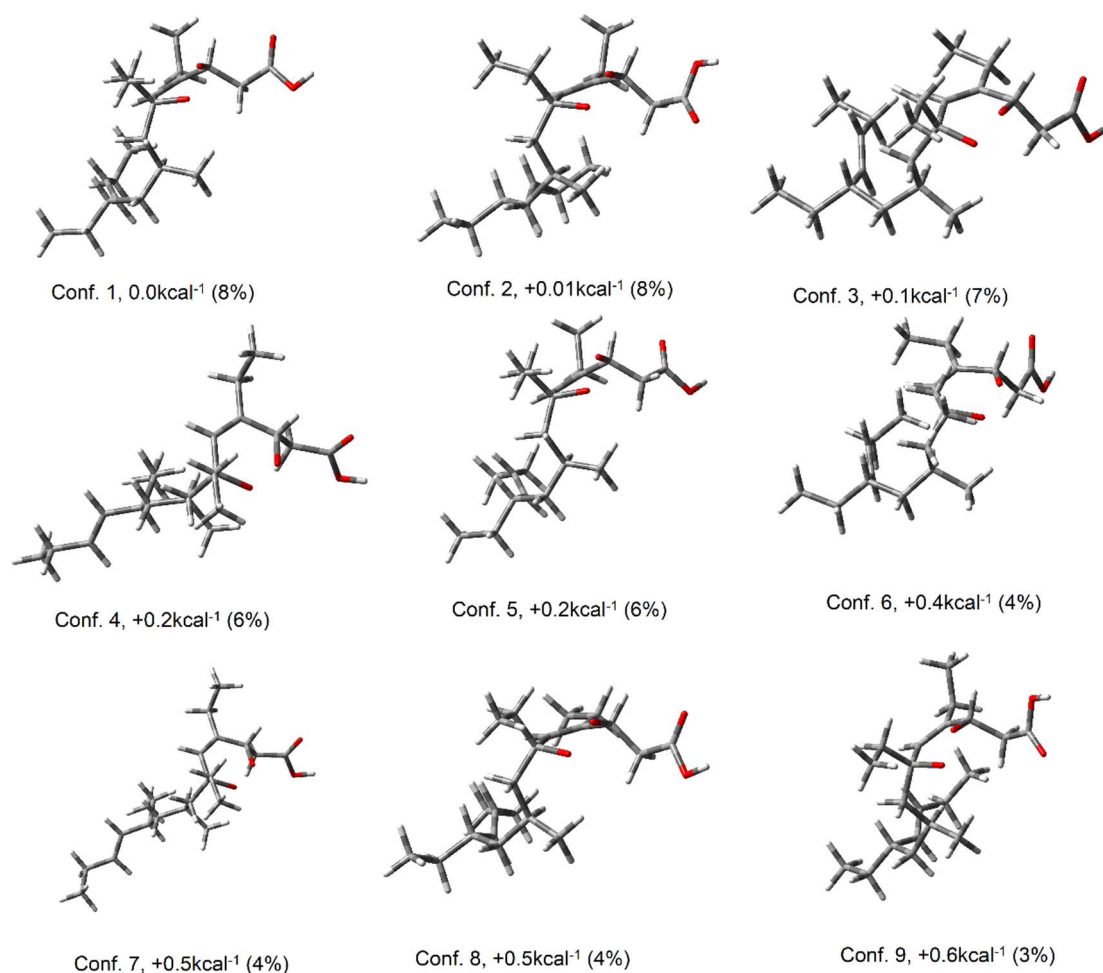

Isomer 2: 334 conformers with relative energy within 10 kcal mol<sup>-1</sup> of the lowest energy conformer were selected for further geometry optimized at the B3LYP/6-31G\* level. 52 conformers were identified with relative energy < 2.0 kcal mol<sup>-1</sup>, corresponding to more than 87% of the total Boltzmann distribution.

**Table S3:** Lowest energy conformers of isomer 3 of isolated compound at B3LYP/6-31G\* level.

| Conformers<br>isomer 3 | Rel.<br>Energy<br>(kcal/mol) | Boltzmann<br>population |
|------------------------|------------------------------|-------------------------|
| isomer3_conf1          | 0.00                         | 6.84%                   |
| isomer3_conf2          | 0.12                         | 5.56%                   |
| isomer3_conf3          | 0.21                         | 4.78%                   |
| isomer3_conf4          | 0.31                         | 4.06%                   |
| isomer3_conf5          | 0.37                         | 3.67%                   |
| isomer3_conf6          | 0.41                         | 3.41%                   |
| isomer3_conf7          | 0.42                         | 3.37%                   |
| isomer3_conf8          | 0.43                         | 3.29%                   |
| isomer3_conf9          | 0.45                         | 3.22%                   |
| isomer3_conf10         | 0.65                         | 2.30%                   |
| isomer3_conf11         | 0.70                         | 2.10%                   |
| isomer3_conf12         | 0.81                         | 1.73%                   |
| isomer3_conf13         | 0.83                         | 1.69%                   |
| isomer3_conf14         | 0.84                         | 1.66%                   |
| isomer3_conf15         | 0.90                         | 1.50%                   |
| isomer3_conf16         | 0.91                         | 1.47%                   |
| isomer3_conf17         | 0.92                         | 1.45%                   |
| isomer3_conf18         | 0.94                         | 1.40%                   |
| isomer3_conf19         | 0.94                         | 1.39%                   |
| isomer3_conf20         | 0.95                         | 1.38%                   |
| isomer3_conf21         | 0.97                         | 1.33%                   |
| isomer3_conf22         | 1.02                         | 1.23%                   |
| isomer3_conf23         | 1.03                         | 1.19%                   |
| isomer3_conf24         | 1.06                         | 1.14%                   |
| isomer3_conf25         | 1.08                         | 1.11%                   |
| isomer3_conf26         | 1.09                         | 1.09%                   |
| isomer3_conf27         | 1.11                         | 1.04%                   |
| isomer3_conf28         | 1.12                         | 1.04%                   |
| isomer3_conf29         | 1.12                         | 1.02%                   |
| isomer3_conf30         | 1.13                         | 1.01%                   |
| isomer3_conf31         | 1.15                         | 0.98%                   |
| isomer3_conf32         | 1.18                         | 0.93%                   |
| isomer3_conf33         | 1.19                         | 0.91%                   |
| isomer3_conf34         | 1.21                         | 0.89%                   |
| isomer3_conf35         | 1.21                         | 0.89%                   |
| isomer3_conf36         | 1.21                         | 0.89%                   |
| isomer3_conf37         | 1.21                         | 0.88%                   |
| isomer3_conf38         | 1.28                         | 0.79%                   |
| isomer3_conf39         | 1.31                         | 0.75%                   |
| isomer3_conf40         | 1.33                         | 0.72%                   |

|                |      |       |
|----------------|------|-------|
| isomer3_conf41 | 1.33 | 0.72% |
| isomer3_conf42 | 1.36 | 0.69% |
| isomer3_conf43 | 1.36 | 0.69% |
| isomer3_conf44 | 1.37 | 0.68% |
| isomer3_conf45 | 1.38 | 0.67% |
| isomer3_conf46 | 1.38 | 0.66% |
| isomer3_conf47 | 1.41 | 0.63% |
| isomer3_conf48 | 1.42 | 0.62% |
| isomer3_conf49 | 1.45 | 0.59% |
| isomer3_conf50 | 1.46 | 0.58% |
| isomer3_conf51 | 1.48 | 0.56% |
| isomer3_conf52 | 1.48 | 0.56% |
| isomer3_conf53 | 1.49 | 0.56% |
| isomer3_conf54 | 1.50 | 0.54% |
| isomer3_conf55 | 1.51 | 0.53% |
| isomer3_conf56 | 1.52 | 0.53% |
| isomer3_conf57 | 1.53 | 0.52% |
| isomer3_conf58 | 1.53 | 0.51% |
| isomer3_conf59 | 1.54 | 0.51% |
| isomer3_conf60 | 1.54 | 0.51% |
| isomer3_conf61 | 1.54 | 0.51% |
| isomer3_conf62 | 1.56 | 0.49% |
| isomer3_conf63 | 1.61 | 0.45% |
| isomer3_conf64 | 1.61 | 0.45% |
| isomer3_conf65 | 1.61 | 0.45% |
| isomer3_conf66 | 1.62 | 0.44% |
| isomer3_conf67 | 1.64 | 0.43% |
| isomer3_conf68 | 1.65 | 0.42% |
| isomer3_conf69 | 1.65 | 0.42% |
| isomer3_conf70 | 1.65 | 0.42% |
| isomer3_conf71 | 1.67 | 0.40% |
| isomer3_conf72 | 1.68 | 0.40% |
| isomer3_conf73 | 1.68 | 0.40% |
| isomer3_conf74 | 1.70 | 0.39% |
| isomer3_conf75 | 1.73 | 0.37% |
| isomer3_conf76 | 1.75 | 0.36% |
| isomer3_conf77 | 1.76 | 0.35% |
| isomer3_conf78 | 1.77 | 0.34% |
| isomer3_conf79 | 1.79 | 0.33% |
| isomer3_conf80 | 1.81 | 0.32% |
| isomer3_conf81 | 1.82 | 0.32% |
| isomer3_conf82 | 1.84 | 0.30% |
| isomer3_conf83 | 1.85 | 0.30% |
| isomer3_conf84 | 1.86 | 0.30% |
| isomer3_conf85 | 1.86 | 0.30% |
| isomer3_conf86 | 1.86 | 0.29% |
| isomer3_conf87 | 1.88 | 0.29% |
| isomer3_conf88 | 1.89 | 0.28% |
| isomer3_conf89 | 1.91 | 0.27% |
| isomer3_conf90 | 1.95 | 0.25% |

|                |      |       |
|----------------|------|-------|
| isomer3_conf91 | 1.97 | 0.25% |
| isomer3_conf92 | 1.97 | 0.25% |
| isomer3_conf93 | 1.97 | 0.24% |
| isomer3_conf94 | 2.00 | 0.23% |

**Figure S3:** The 9 lowest energy conformers of isomer 3 of isolated compound at B3LYP/6-31G\* level.

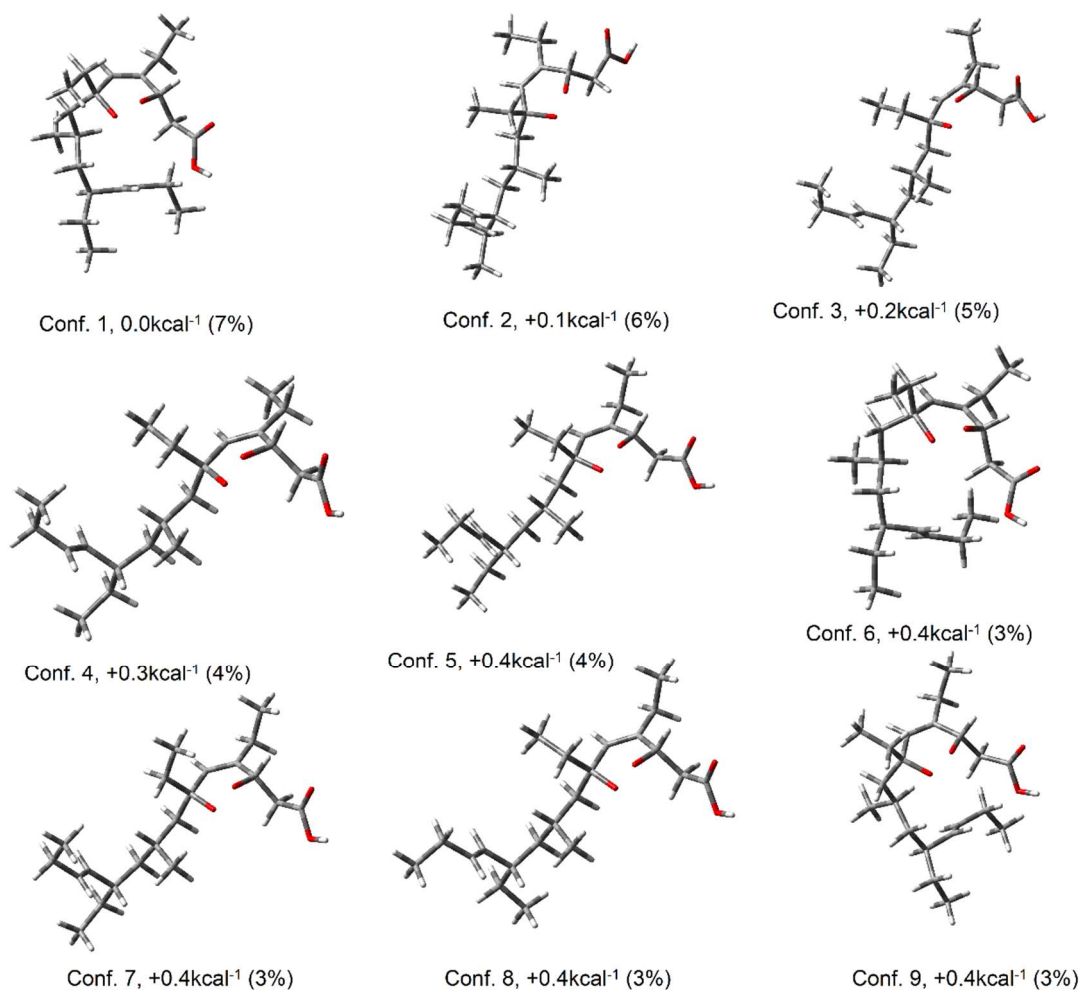

Isomer 3: 279 conformers with relative energy within 10 kcal mol<sup>-1</sup> of the lowest energy conformer were selected for further geometry optimized at the B3LYP/6-31G\* level. 94 conformers were identified with relative energy < 2.0 kcal mol<sup>-1</sup>, corresponding to more than 90% of the total Boltzmann distribution.

**Table S4:** Lowest energy conformers of isomer 4 of isolated compound at B3LYP/6-31G\* level.

| Conformers<br>isomer 2 | Rel.<br>Energy<br>(kcal/mol) | Boltzmann<br>population |
|------------------------|------------------------------|-------------------------|
| isomer4_conf1          | 0.00                         | 26.06%                  |
| isomer4_conf2          | 0.30                         | 15.64%                  |
| isomer4_conf3          | 0.37                         | 14.05%                  |
| isomer4_conf4          | 0.43                         | 12.69%                  |
| isomer4_conf5          | 1.00                         | 4.80%                   |
| isomer4_conf6          | 1.16                         | 3.70%                   |
| isomer4_conf7          | 1.17                         | 3.61%                   |
| isomer4_conf8          | 1.20                         | 3.43%                   |
| isomer4_conf9          | 1.22                         | 3.32%                   |
| isomer4_conf10         | 1.25                         | 3.18%                   |
| isomer4_conf11         | 1.45                         | 2.24%                   |
| isomer4_conf12         | 1.46                         | 2.23%                   |
| isomer4_conf13         | 1.59                         | 1.77%                   |
| isomer4_conf14         | 1.74                         | 1.39%                   |
| isomer4_conf15         | 1.92                         | 1.01%                   |
| isomer4_conf16         | 2.00                         | 0.88%                   |

**Figure S4:** The 9 lowest energy conformers of isomer 4 of isolated compound at B3LYP/6-31G\* level.

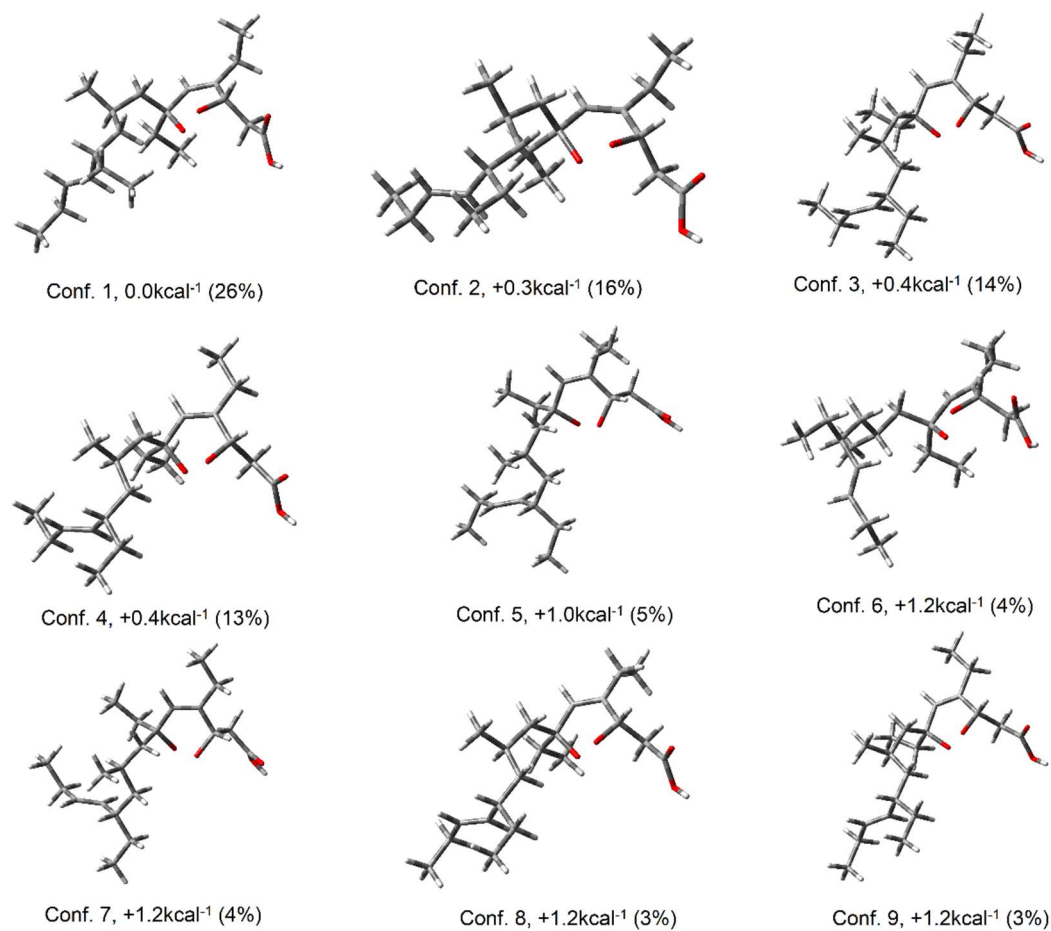

Isomer 4: 156 conformers with relative energy within 10 kcal mol<sup>-1</sup> of the lowest energy conformer were selected for further geometry optimized at the B3LYP/6-31G\* level. 16 conformers were identified with relative energy < 2.0 kcal mol<sup>-1</sup>, corresponding to more than 83% of the total Boltzmann distribution.

**Table S5:** Lowest energy conformers of isomer 5 of isolated compound at B3LYP/6-31G\* level.

| Conformers<br>isomer 2 | Rel.<br>Energy<br>(kcal/mol) | Boltzmann<br>population |
|------------------------|------------------------------|-------------------------|
| isomer5_conf1          | 0.00                         | 51.15%                  |
| isomer5_conf2          | 0.95                         | 10.29%                  |
| isomer5_conf3          | 1.24                         | 6.27%                   |
| isomer5_conf4          | 1.26                         | 6.06%                   |
| isomer5_conf5          | 1.34                         | 5.32%                   |
| isomer5_conf6          | 1.37                         | 5.08%                   |
| isomer5_conf7          | 1.48                         | 4.21%                   |
| isomer5_conf8          | 1.58                         | 3.58%                   |
| isomer5_conf9          | 1.71                         | 2.86%                   |
| isomer5_conf10         | 1.75                         | 2.68%                   |
| isomer5_conf11         | 1.79                         | 2.48%                   |

**Figure S5:** The 9 lowest energy conformers of isomer 5 of isolated compound at B3LYP/6-31G\* level.

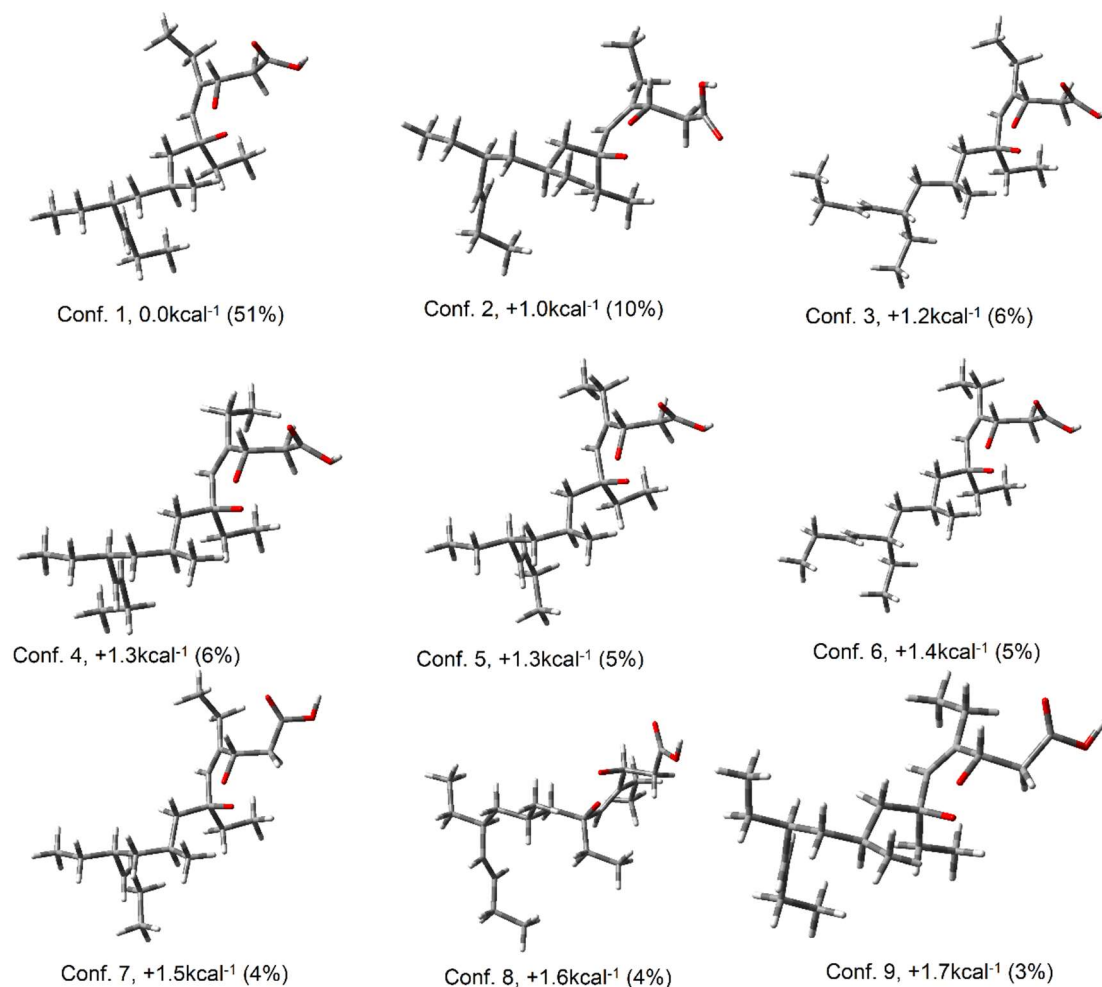

Isomer 5: 84 conformers with relative energy within 10 kcal mol<sup>-1</sup> of the lowest energy conformer were selected for further geometry optimized at the B3LYP/6-31G\* level. 11 conformers were identified with relative energy < 2.0 kcal mol<sup>-1</sup>, corresponding to more than 85% of the total Boltzmann distribution.

**Table S6:** Lowest energy conformers of isomer 6 of isolated compound at B3LYP/6-31G\* level.

| Conformers<br>isomer 2 | Rel.<br>Energy<br>(kcal/mol) | Boltzmann<br>population |
|------------------------|------------------------------|-------------------------|
| isomer6_conf1          | 0.00                         | 10.97%                  |
| isomer6_conf2          | 0.12                         | 8.89%                   |
| isomer6_conf3          | 0.18                         | 8.04%                   |
| isomer6_conf4          | 0.21                         | 7.64%                   |
| isomer6_conf5          | 0.44                         | 5.18%                   |
| isomer6_conf6          | 0.68                         | 3.49%                   |
| isomer6_conf7          | 0.78                         | 2.93%                   |
| isomer6_conf8          | 0.85                         | 2.62%                   |
| isomer6_conf9          | 0.85                         | 2.61%                   |
| isomer6_conf10         | 0.90                         | 2.40%                   |
| isomer6_conf11         | 0.90                         | 2.38%                   |
| isomer6_conf12         | 0.91                         | 2.36%                   |
| isomer6_conf13         | 0.97                         | 2.12%                   |
| isomer6_conf14         | 0.99                         | 2.06%                   |
| isomer6_conf15         | 1.08                         | 1.77%                   |
| isomer6_conf16         | 1.09                         | 1.73%                   |
| isomer6_conf17         | 1.16                         | 1.56%                   |
| isomer6_conf18         | 1.16                         | 1.55%                   |
| isomer6_conf19         | 1.17                         | 1.53%                   |
| isomer6_conf20         | 1.19                         | 1.47%                   |
| isomer6_conf21         | 1.20                         | 1.46%                   |
| isomer6_conf22         | 1.26                         | 1.31%                   |
| isomer6_conf23         | 1.28                         | 1.26%                   |
| isomer6_conf24         | 1.33                         | 1.17%                   |
| isomer6_conf25         | 1.33                         | 1.16%                   |
| isomer6_conf26         | 1.34                         | 1.13%                   |
| isomer6_conf27         | 1.36                         | 1.10%                   |
| isomer6_conf28         | 1.39                         | 1.05%                   |
| isomer6_conf29         | 1.41                         | 1.02%                   |
| isomer6_conf30         | 1.43                         | 0.97%                   |
| isomer6_conf31         | 1.44                         | 0.96%                   |
| isomer6_conf32         | 1.45                         | 0.95%                   |
| isomer6_conf33         | 1.49                         | 0.88%                   |
| isomer6_conf34         | 1.51                         | 0.86%                   |
| isomer6_conf35         | 1.51                         | 0.86%                   |
| isomer6_conf36         | 1.52                         | 0.85%                   |
| isomer6_conf37         | 1.58                         | 0.76%                   |
| isomer6_conf38         | 1.61                         | 0.72%                   |
| isomer6_conf39         | 1.62                         | 0.71%                   |
| isomer6_conf40         | 1.66                         | 0.67%                   |

|                |      |       |
|----------------|------|-------|
| isomer6_conf41 | 1.73 | 0.59% |
| isomer6_conf42 | 1.76 | 0.56% |
| isomer6_conf43 | 1.77 | 0.55% |
| isomer6_conf44 | 1.82 | 0.50% |
| isomer6_conf45 | 1.83 | 0.50% |
| isomer6_conf46 | 1.89 | 0.45% |
| isomer6_conf47 | 1.89 | 0.45% |
| isomer6_conf48 | 1.89 | 0.45% |
| isomer6_conf49 | 1.93 | 0.42% |
| isomer6_conf50 | 1.93 | 0.42% |
| isomer6_conf51 | 1.95 | 0.41% |
| isomer6_conf52 | 1.96 | 0.40% |
| isomer6_conf53 | 1.98 | 0.39% |
| isomer6_conf54 | 1.98 | 0.39% |
| isomer6_conf55 | 2.00 | 0.37% |

---

**Figure S6:** The 9 lowest energy conformers of isomer 6 of isolated compound at B3LYP/6-31G\* level.

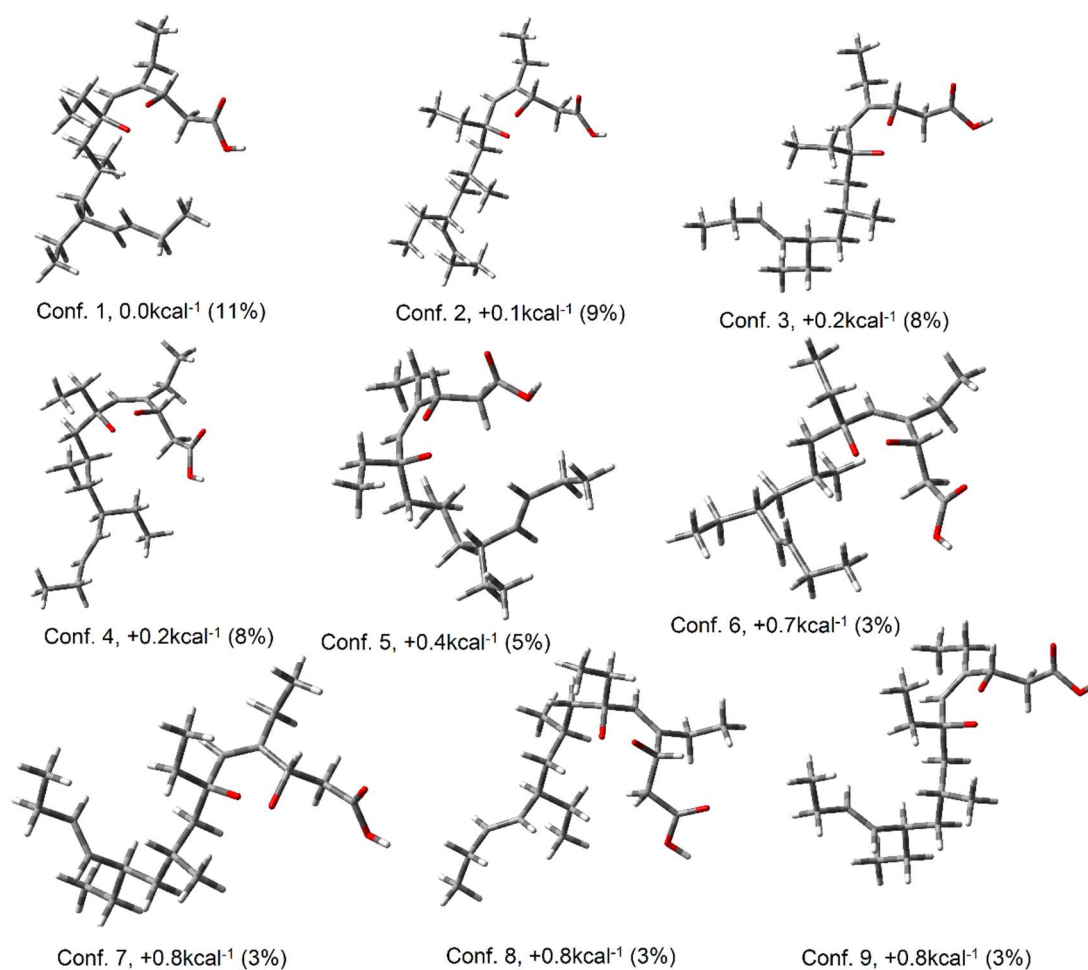

Isomer 6: 255 conformers with relative energy within 10 kcal mol<sup>-1</sup> of the lowest energy conformer were selected for further geometry optimized at the B3LYP/6-31G\* level. 55 conformers were identified with relative energy < 2.0 kcal mol<sup>-1</sup>, corresponding to more than 86% of the total Boltzmann distribution.

**Table S7:** Lowest energy conformers of isomer 7 of isolated compound at B3LYP/6-31G\* level.

| Conformers<br>isomer 2 | Rel.<br>Energy<br>(kcal/mol) | Boltzmann<br>population |
|------------------------|------------------------------|-------------------------|
| isomer7_conf1          | 0.00                         | 14.43%                  |
| isomer7_conf2          | 0.25                         | 9.53%                   |
| isomer7_conf3          | 0.25                         | 9.51%                   |
| isomer7_conf4          | 0.38                         | 7.58%                   |
| isomer7_conf5          | 0.39                         | 7.49%                   |
| isomer7_conf6          | 0.57                         | 5.53%                   |
| isomer7_conf7          | 0.76                         | 3.97%                   |
| isomer7_conf8          | 0.81                         | 3.65%                   |
| isomer7_conf9          | 0.82                         | 3.60%                   |
| isomer7_conf10         | 0.96                         | 2.87%                   |
| isomer7_conf11         | 0.99                         | 2.73%                   |
| isomer7_conf12         | 1.05                         | 2.47%                   |
| isomer7_conf13         | 1.06                         | 2.41%                   |
| isomer7_conf14         | 1.15                         | 2.08%                   |
| isomer7_conf15         | 1.23                         | 1.79%                   |
| isomer7_conf16         | 1.43                         | 1.28%                   |
| isomer7_conf17         | 1.44                         | 1.27%                   |
| isomer7_conf18         | 1.44                         | 1.26%                   |
| isomer7_conf19         | 1.48                         | 1.18%                   |
| isomer7_conf20         | 1.53                         | 1.09%                   |
| isomer7_conf21         | 1.60                         | 0.97%                   |
| isomer7_conf22         | 1.61                         | 0.96%                   |
| isomer7_conf23         | 1.62                         | 0.94%                   |
| isomer7_conf24         | 1.66                         | 0.88%                   |
| isomer7_conf25         | 1.74                         | 0.76%                   |
| isomer7_conf26         | 1.75                         | 0.76%                   |
| isomer7_conf27         | 1.75                         | 0.75%                   |
| isomer7_conf28         | 1.76                         | 0.74%                   |
| isomer7_conf29         | 1.77                         | 0.73%                   |
| isomer7_conf30         | 1.79                         | 0.70%                   |
| isomer7_conf31         | 1.80                         | 0.69%                   |
| isomer7_conf32         | 1.82                         | 0.67%                   |
| isomer7_conf33         | 1.83                         | 0.66%                   |
| isomer7_conf34         | 1.83                         | 0.66%                   |
| isomer7_conf35         | 1.84                         | 0.64%                   |
| isomer7_conf36         | 1.89                         | 0.60%                   |
| isomer7_conf37         | 1.92                         | 0.57%                   |
| isomer7_conf38         | 1.94                         | 0.54%                   |
| isomer7_conf39         | 1.95                         | 0.54%                   |
| isomer7_conf40         | 1.95                         | 0.54%                   |

**Figure S7:** The 9 lowest energy conformers of isomer 7 of isolated compound at B3LYP/6-31G\* level.

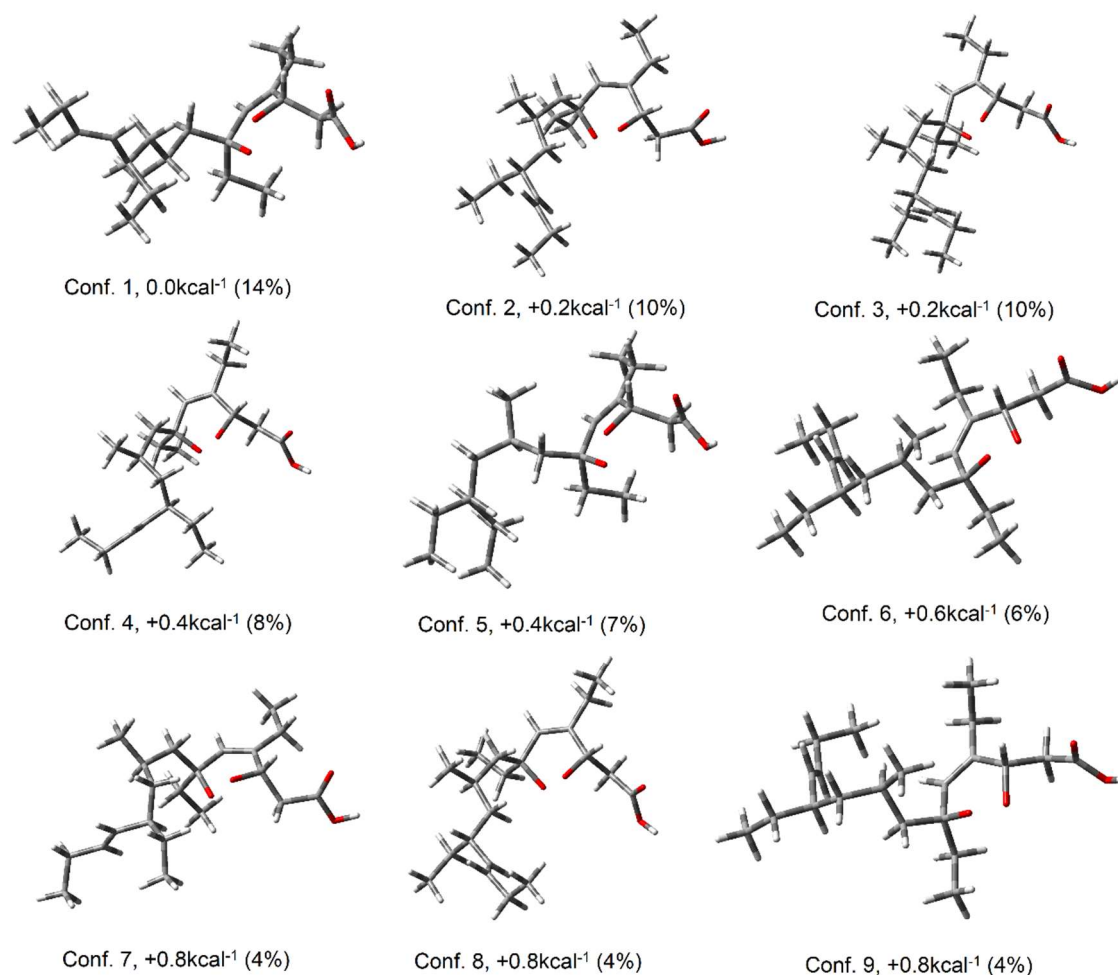

Isomer 7: 96 conformers with relative energy within 10 kcal mol<sup>-1</sup> of the lowest energy conformer were selected for further geometry optimized at the B3LYP/6-31G\* level. 40 conformers were identified with relative energy < 2.0 kcal mol<sup>-1</sup>, corresponding to more than 91% of the total Boltzmann distribution.

**Table S8:** Lowest energy conformers of isomer 8 of isolated compound at B3LYP/6-31G\* level.

| Conformers<br>isomer 2 | Rel.<br>Energy<br>(kcal/mol) | Boltzmann<br>population |
|------------------------|------------------------------|-------------------------|
| isomer8_conf1          | 0.00                         | 30.33%                  |
| isomer8_conf2          | 0.70                         | 9.31%                   |
| isomer8_conf3          | 0.78                         | 8.12%                   |
| isomer8_conf4          | 0.90                         | 6.58%                   |
| isomer8_conf5          | 0.94                         | 6.19%                   |
| isomer8_conf6          | 0.95                         | 6.12%                   |
| isomer8_conf7          | 1.04                         | 5.27%                   |
| isomer8_conf8          | 1.11                         | 4.66%                   |
| isomer8_conf9          | 1.31                         | 3.35%                   |
| isomer8_conf10         | 1.32                         | 3.27%                   |
| isomer8_conf11         | 1.46                         | 2.58%                   |
| isomer8_conf12         | 1.60                         | 2.03%                   |
| isomer8_conf13         | 1.67                         | 1.81%                   |
| isomer8_conf14         | 1.68                         | 1.78%                   |
| isomer8_conf15         | 1.70                         | 1.73%                   |
| isomer8_conf16         | 1.70                         | 1.71%                   |
| isomer8_conf17         | 1.78                         | 1.51%                   |
| isomer8_conf18         | 1.85                         | 1.32%                   |
| isomer8_conf19         | 1.86                         | 1.30%                   |
| isomer8_conf20         | 2.00                         | 1.03%                   |

**Figure S8:** The 9 lowest energy conformers of isomer 8 of isolated compound at B3LYP/6-31G\* level.

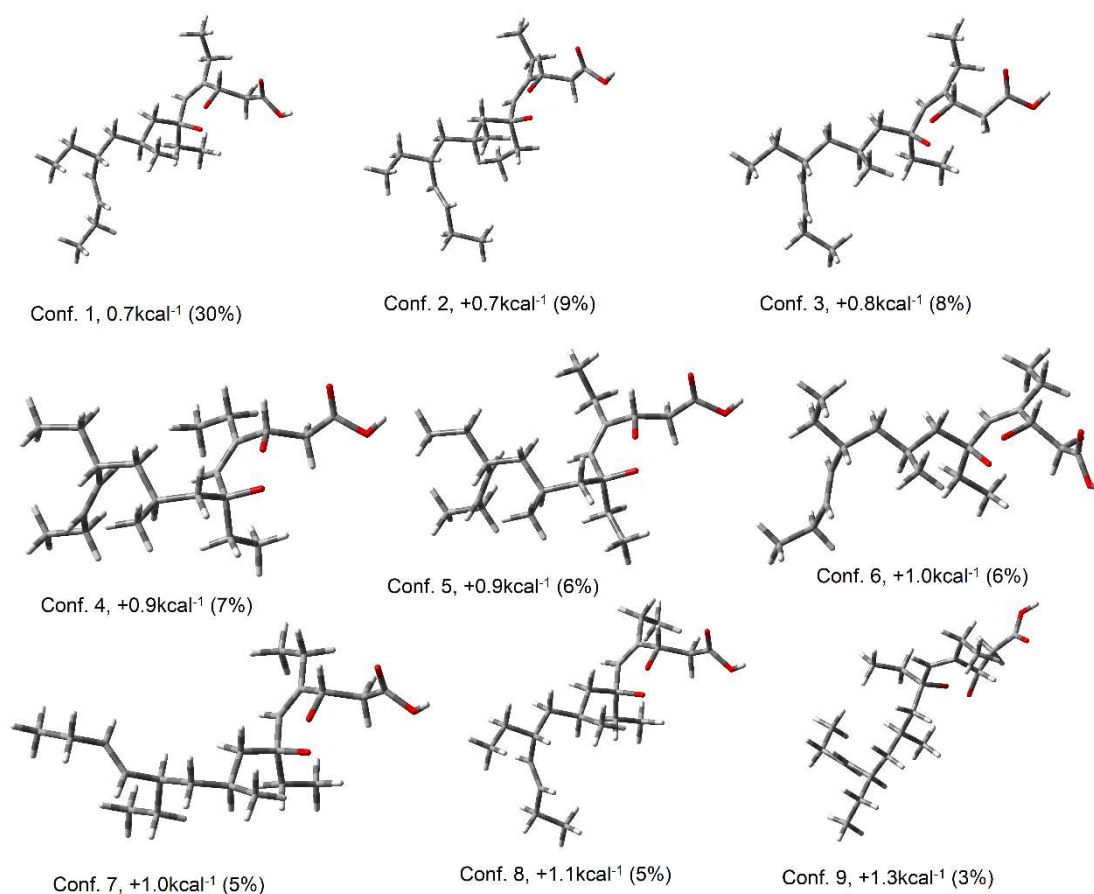

Isomer 8: 276 conformers with relative energy within 10 kcal mol<sup>-1</sup> of the lowest energy conformer were selected for further geometry optimized at the B3LYP/6-31G\* level. 20 conformers were identified with relative energy < 2.0 kcal mol<sup>-1</sup>, corresponding to more than 75% of the total Boltzmann distribution.

**Table S9:** Comparison of calculated  $\delta_{\text{scal}}$  (generalized scaling factor)  $^{13}\text{C}$  NMR chemical shifts simulated for the possible stereoisomers of **1** (GIAOmPW1PW91/6-31G(d)//B3LYP/6-31G(d)) with the experimental values ( $\delta_{\text{exp}}$ , 90.5 MHz,  $\text{CDCl}_3$ ) of the isolated natural product.

| Atom number | Isomer 1<br>( $\delta_{\text{scal}}^{13}\text{C}$ , ppm) | Isomer 2<br>( $\delta_{\text{scal}}^{13}\text{C}$ , ppm) | Isomer 3<br>( $\delta_{\text{scal}}^{13}\text{C}$ , ppm) | Isomer 4<br>( $\delta_{\text{scal}}^{13}\text{C}$ , ppm) | Isomer 5<br>( $\delta_{\text{scal}}^{13}\text{C}$ , ppm) | Isomer 6<br>( $\delta_{\text{scal}}^{13}\text{C}$ , ppm) | Isomer 7<br>( $\delta_{\text{scal}}^{13}\text{C}$ , ppm) | Isomer 8<br>( $\delta_{\text{scal}}^{13}\text{C}$ , ppm) | Isolated compound <sup>a</sup><br>( $\delta_{\text{exp}}^{13}\text{C}$ , ppm) |
|-------------|----------------------------------------------------------|----------------------------------------------------------|----------------------------------------------------------|----------------------------------------------------------|----------------------------------------------------------|----------------------------------------------------------|----------------------------------------------------------|----------------------------------------------------------|-------------------------------------------------------------------------------|
| C1          | 178.1                                                    | 178.3                                                    | 178.4                                                    | 178.2                                                    | 178.1                                                    | 178.3                                                    | 178.4                                                    | 178.5                                                    | 176.6                                                                         |
| C2          | 39.9                                                     | 40.6                                                     | 39.7                                                     | 38.5                                                     | 39.3                                                     | 39.1                                                     | 39.2                                                     | 39.3                                                     | 35.3                                                                          |
| C3          | 80.5                                                     | 79.9                                                     | 80.3                                                     | 80.7                                                     | 80.4                                                     | 80.0                                                     | 81.3                                                     | 80.2                                                     | 76.5                                                                          |
| C4          | 145.9                                                    | 146.1                                                    | 145.9                                                    | 145.2                                                    | 145.7                                                    | 145.1                                                    | 145.3                                                    | 145.8                                                    | 137.5                                                                         |
| C5          | 131.9                                                    | 132.3                                                    | 131.7                                                    | 132.4                                                    | 133.2                                                    | 132.7                                                    | 130.9                                                    | 132.3                                                    | 124.9                                                                         |
| C6          | 89.8                                                     | 89.8                                                     | 89.4                                                     | 89.1                                                     | 88.8                                                     | 88.7                                                     | 88.7                                                     | 88.6                                                     | 83.6                                                                          |
| C7          | 45.6                                                     | 43.8                                                     | 46.7                                                     | 44.0                                                     | 42.0                                                     | 44.1                                                     | 45.9                                                     | 45.7                                                     | 43.3                                                                          |
| C8          | 30.6                                                     | 29.6                                                     | 30.2                                                     | 30.3                                                     | 30.2                                                     | 29.8                                                     | 29.7                                                     | 31.4                                                     | 25.9                                                                          |
| C9          | 46.5                                                     | 47.9                                                     | 47.8                                                     | 42.6                                                     | 48.1                                                     | 48.1                                                     | 46.7                                                     | 48.0                                                     | 44.5                                                                          |
| C10         | 47.4                                                     | 47.4                                                     | 47.8                                                     | 47.1                                                     | 47.1                                                     | 47.5                                                     | 47.7                                                     | 47.2                                                     | 42.3                                                                          |
| C11         | 138.5                                                    | 139.7                                                    | 139.0                                                    | 139.1                                                    | 138.8                                                    | 139.1                                                    | 140.0                                                    | 138.7                                                    | 133.2                                                                         |
| C12         | 137.7                                                    | 138.1                                                    | 138.5                                                    | 138.1                                                    | 138.3                                                    | 138.5                                                    | 137.7                                                    | 138.8                                                    | 132.1                                                                         |
| C13         | 30.9                                                     | 31.3                                                     | 30.7                                                     | 31.2                                                     | 31.0                                                     | 31.2                                                     | 31.3                                                     | 31.3                                                     | 25.7                                                                          |
| C14         | 16.4                                                     | 16.9                                                     | 16.7                                                     | 17.1                                                     | 16.7                                                     | 16.8                                                     | 17.1                                                     | 17.1                                                     | 14.2                                                                          |
| C15         | 30.1                                                     | 30.7                                                     | 30.2                                                     | 30.2                                                     | 30.1                                                     | 30.4                                                     | 29.5                                                     | 30.2                                                     | 24.8                                                                          |
| C16         | 14.1                                                     | 14.8                                                     | 14.1                                                     | 14.6                                                     | 14.9                                                     | 14.6                                                     | 12.9                                                     | 15.0                                                     | 11.7                                                                          |
| C17         | 34.6                                                     | 35.1                                                     | 33.3                                                     | 30.3                                                     | 30.7                                                     | 33.4                                                     | 32.4                                                     | 31.2                                                     | 30.9                                                                          |
| C18         | 9.7                                                      | 9.6                                                      | 10.0                                                     | 9.6                                                      | 9.4                                                      | 9.8                                                      | 9.6                                                      | 9.7                                                      | 8.1                                                                           |
| C19         | 21.5                                                     | 24.3                                                     | 20.7                                                     | 21.7                                                     | 21.9                                                     | 22.9                                                     | 23.3                                                     | 18.7                                                     | 21.3                                                                          |
| C20         | 32.2                                                     | 31.5                                                     | 32.7                                                     | 33.6                                                     | 31.6                                                     | 31.4                                                     | 30.1                                                     | 32.1                                                     | 28.9                                                                          |
| C21         | 13.7                                                     | 13.8                                                     | 14.1                                                     | 12.7                                                     | 14.0                                                     | 13.9                                                     | 13.9                                                     | 14.2                                                     | 11.6                                                                          |
| MAD         | 3.95                                                     | 4.22                                                     | 4.10                                                     | 3.73                                                     | 3.83                                                     | 3.93                                                     | 3.75                                                     | 4.12                                                     |                                                                               |

Abbreviations: MAD, mean absolute deviation; RMSD, root mean square deviation.

<sup>a</sup>Data extracted from ref. 5.

**Table S10:** Comparison of calculated  $\delta_{\text{scal}}$  (internal scaling factor)  $^{13}\text{C}$  NMR chemical shifts simulated for the possible stereoisomers of **1** (GIAOmPW1PW91/6-31G(d)//B3LYP/6-31G(d)) with the experimental values ( $\delta_{\text{exp}}$ , 90.5 MHz,  $\text{CDCl}_3$ ) of the isolated natural product.

| Atom number | Isomer 1<br>( $\delta_{\text{scal}}^{13}\text{C}$ , ppm) | Isomer 2<br>( $\delta_{\text{scal}}^{13}\text{C}$ , ppm) | Isomer 3<br>( $\delta_{\text{scal}}^{13}\text{C}$ , ppm) | Isomer 4<br>( $\delta_{\text{scal}}^{13}\text{C}$ , ppm) | Isomer 5<br>( $\delta_{\text{scal}}^{13}\text{C}$ , ppm) | Isomer 6<br>( $\delta_{\text{scal}}^{13}\text{C}$ , ppm) | Isomer 7<br>( $\delta_{\text{scal}}^{13}\text{C}$ , ppm) | Isomer 8<br>( $\delta_{\text{scal}}^{13}\text{C}$ , ppm) | Isolated compound <sup>a</sup><br>( $\delta_{\text{exp}}^{13}\text{C}$ , ppm) |
|-------------|----------------------------------------------------------|----------------------------------------------------------|----------------------------------------------------------|----------------------------------------------------------|----------------------------------------------------------|----------------------------------------------------------|----------------------------------------------------------|----------------------------------------------------------|-------------------------------------------------------------------------------|
| <b>C1</b>   | 172.1                                                    | 172.0                                                    | 172.1                                                    | 172.1                                                    | 171.8                                                    | 172.1                                                    | 172.2                                                    | 172.1                                                    | <b>176.6</b>                                                                  |
| <b>C2</b>   | 36.4                                                     | 36.8                                                     | 36.0                                                     | 35.5                                                     | 36.0                                                     | 35.6                                                     | 35.9                                                     | 35.9                                                     | <b>35.3</b>                                                                   |
| <b>C3</b>   | 76.2                                                     | 75.3                                                     | 76.0                                                     | 76.8                                                     | 76.3                                                     | 75.7                                                     | 77.2                                                     | 76.0                                                     | <b>76.5</b>                                                                   |
| <b>C4</b>   | 140.4                                                    | 140.4                                                    | 140.2                                                    | 139.9                                                    | 140.2                                                    | 139.7                                                    | 139.8                                                    | 140.2                                                    | <b>137.5</b>                                                                  |
| <b>C5</b>   | 126.7                                                    | 126.9                                                    | 126.3                                                    | 127.4                                                    | 127.9                                                    | 127.5                                                    | 125.7                                                    | 127.0                                                    | <b>124.9</b>                                                                  |
| <b>C6</b>   | 85.4                                                     | 85.1                                                     | 84.8                                                     | 85.0                                                     | 84.5                                                     | 84.3                                                     | 84.4                                                     | 84.1                                                     | <b>83.6</b>                                                                   |
| <b>C7</b>   | 42.0                                                     | 39.8                                                     | 43.0                                                     | 40.9                                                     | 38.7                                                     | 40.6                                                     | 42.5                                                     | 42.2                                                     | <b>43.3</b>                                                                   |
| <b>C8</b>   | 27.2                                                     | 26.0                                                     | 26.9                                                     | 27.5                                                     | 27.2                                                     | 26.4                                                     | 26.7                                                     | 28.2                                                     | <b>25.9</b>                                                                   |
| <b>C9</b>   | 42.9                                                     | 44.0                                                     | 44.1                                                     | 39.5                                                     | 44.8                                                     | 44.5                                                     | 43.3                                                     | 44.5                                                     | <b>44.5</b>                                                                   |
| <b>C10</b>  | 43.7                                                     | 43.6                                                     | 44.1                                                     | 44.0                                                     | 43.8                                                     | 43.9                                                     | 44.3                                                     | 43.7                                                     | <b>42.3</b>                                                                   |
| <b>C11</b>  | 133.2                                                    | 134.1                                                    | 133.4                                                    | 133.8                                                    | 133.5                                                    | 133.7                                                    | 134.7                                                    | 133.3                                                    | <b>133.2</b>                                                                  |
| <b>C12</b>  | 132.4                                                    | 132.4                                                    | 132.9                                                    | 132.9                                                    | 133.0                                                    | 133.2                                                    | 132.4                                                    | 133.3                                                    | <b>132.1</b>                                                                  |
| <b>C13</b>  | 27.5                                                     | 27.7                                                     | 27.3                                                     | 28.4                                                     | 28.0                                                     | 27.9                                                     | 28.2                                                     | 28.0                                                     | <b>25.7</b>                                                                   |
| <b>C14</b>  | 13.3                                                     | 13.6                                                     | 13.6                                                     | 14.7                                                     | 14.1                                                     | 13.8                                                     | 14.2                                                     | 14.3                                                     | <b>14.2</b>                                                                   |
| <b>C15</b>  | 26.7                                                     | 27.1                                                     | 26.8                                                     | 27.4                                                     | 27.1                                                     | 27.1                                                     | 26.4                                                     | 27.0                                                     | <b>24.8</b>                                                                   |
| <b>C16</b>  | 11.1                                                     | 11.4                                                     | 11.0                                                     | 12.2                                                     | 12.3                                                     | 11.6                                                     | 10.2                                                     | 12.2                                                     | <b>11.7</b>                                                                   |
| <b>C17</b>  | 31.2                                                     | 31.4                                                     | 29.8                                                     | 27.5                                                     | 27.7                                                     | 30.0                                                     | 29.2                                                     | 27.9                                                     | <b>30.9</b>                                                                   |
| <b>C18</b>  | 6.7                                                      | 6.3                                                      | 7.0                                                      | 7.3                                                      | 6.9                                                      | 6.9                                                      | 6.9                                                      | 7.0                                                      | <b>8.1</b>                                                                    |
| <b>C19</b>  | 18.3                                                     | 20.8                                                     | 17.5                                                     | 19.1                                                     | 19.1                                                     | 19.8                                                     | 20.4                                                     | 15.8                                                     | <b>21.3</b>                                                                   |
| <b>C20</b>  | 28.8                                                     | 27.9                                                     | 29.2                                                     | 30.7                                                     | 28.6                                                     | 28.0                                                     | 27.1                                                     | 28.9                                                     | <b>28.9</b>                                                                   |
| <b>C21</b>  | 10.6                                                     | 10.5                                                     | 11.0                                                     | 10.3                                                     | 11.4                                                     | 10.9                                                     | 11.1                                                     | 11.4                                                     | <b>11.6</b>                                                                   |
| <b>MAD</b>  | <b>1.4</b>                                               | <b>1.4</b>                                               | <b>1.3</b>                                               | <b>1.9</b>                                               | <b>1.6</b>                                               | <b>1.3</b>                                               | <b>1.3</b>                                               | <b>1.5</b>                                               |                                                                               |

**Table S11:** Boltzmann averaged  $^{13}\text{C}$  GIAO isotropic magnetic shielding values calculates for all possible stereoisomers of 1 at mPW1PW91/6-31G(d)//B3LYP/6-31G(d).

| Atom<br>number | Isomer<br>1<br>( $\sigma^{13}\text{C}$ ,<br>ppm) | Isomer 2<br>( $\sigma^{13}\text{C}$ ,<br>ppm) | Isomer 3<br>( $\sigma^{13}\text{C}$ ,<br>ppm) | Isomer 4<br>( $\sigma^{13}\text{C}$ ,<br>ppm) | Isomer 5<br>( $\sigma^{13}\text{C}$ ,<br>ppm) | Isomer 6<br>( $\sigma^{13}\text{C}$ ,<br>ppm) | Isomer 7<br>( $\sigma^{13}\text{C}$ ,<br>ppm) | Isomer 8<br>( $\sigma^{13}\text{C}$ ,<br>ppm) |
|----------------|--------------------------------------------------|-----------------------------------------------|-----------------------------------------------|-----------------------------------------------|-----------------------------------------------|-----------------------------------------------|-----------------------------------------------|-----------------------------------------------|
| C1             | 25.8                                             | 25.7                                          | 25.6                                          | 25.7                                          | 25.9                                          | 25.7                                          | 25.6                                          | 25.5                                          |
| C2             | 157.4                                            | 156.8                                         | 157.7                                         | 158.8                                         | 158.1                                         | 158.2                                         | 158.2                                         | 158.0                                         |
| C3             | 118.8                                            | 119.4                                         | 119.0                                         | 118.6                                         | 118.9                                         | 119.3                                         | 118.0                                         | 119.0                                         |
| C4             | 56.5                                             | 56.4                                          | 56.5                                          | 57.2                                          | 56.7                                          | 57.2                                          | 57.1                                          | 56.6                                          |
| C5             | 69.8                                             | 69.4                                          | 70.1                                          | 69.3                                          | 68.6                                          | 69.0                                          | 70.8                                          | 69.4                                          |
| C6             | 109.9                                            | 109.9                                         | 110.4                                         | 110.6                                         | 110.9                                         | 111.0                                         | 111.0                                         | 111.1                                         |
| C7             | 152.0                                            | 153.8                                         | 151.0                                         | 153.5                                         | 155.5                                         | 153.4                                         | 151.8                                         | 151.9                                         |
| C8             | 166.3                                            | 167.3                                         | 166.7                                         | 166.6                                         | 166.7                                         | 167.1                                         | 167.2                                         | 165.5                                         |
| C9             | 151.2                                            | 149.9                                         | 149.9                                         | 154.9                                         | 149.6                                         | 149.6                                         | 151.0                                         | 149.7                                         |
| C10            | 150.3                                            | 150.3                                         | 150.0                                         | 150.6                                         | 150.6                                         | 150.2                                         | 150.0                                         | 150.5                                         |
| C11            | 63.6                                             | 62.4                                          | 63.1                                          | 63.0                                          | 63.2                                          | 63.0                                          | 62.1                                          | 63.3                                          |
| C12            | 64.3                                             | 64.0                                          | 63.6                                          | 63.9                                          | 63.7                                          | 63.5                                          | 64.3                                          | 63.3                                          |
| C13            | 166.1                                            | 165.6                                         | 166.2                                         | 165.8                                         | 165.9                                         | 165.8                                         | 165.7                                         | 165.7                                         |
| C14            | 179.8                                            | 179.4                                         | 179.6                                         | 179.1                                         | 179.5                                         | 179.5                                         | 179.2                                         | 179.2                                         |
| C15            | 166.8                                            | 166.3                                         | 166.7                                         | 166.7                                         | 166.8                                         | 166.5                                         | 167.4                                         | 166.7                                         |
| C16            | 182.1                                            | 181.4                                         | 182.0                                         | 181.5                                         | 181.3                                         | 181.5                                         | 183.2                                         | 181.1                                         |
| C17            | 162.5                                            | 162.0                                         | 163.8                                         | 166.6                                         | 166.3                                         | 163.7                                         | 164.6                                         | 165.8                                         |
| C18            | 186.2                                            | 186.3                                         | 185.9                                         | 186.4                                         | 186.5                                         | 186.1                                         | 186.4                                         | 186.2                                         |
| C19            | 175.0                                            | 172.3                                         | 175.7                                         | 174.8                                         | 174.6                                         | 173.6                                         | 173.3                                         | 177.7                                         |
| C20            | 164.8                                            | 165.5                                         | 164.3                                         | 163.5                                         | 165.4                                         | 165.6                                         | 166.8                                         | 164.9                                         |
| C21            | 182.4                                            | 182.3                                         | 182.1                                         | 183.4                                         | 182.1                                         | 182.2                                         | 182.2                                         | 181.9                                         |

**Table S12:** Boltzmann averaged  $^1\text{H}$  GIAO isotropic magnetic shielding values calculates for all possible stereoisomers of 1 at mPW1PW91/6-31G(d)//B3LYP/6-31G(d).

| Atom number | Isomer 1<br>( $\sigma$ $^1\text{H}$ , ppm) | Isomer 2<br>( $\sigma$ $^1\text{H}$ , ppm) | Isomer 3<br>( $\sigma$ $^1\text{H}$ , ppm) | Isomer 4<br>( $\sigma$ $^1\text{H}$ , ppm) | Isomer 5<br>( $\sigma$ $^1\text{H}$ , ppm) | Isomer 6<br>( $\sigma$ $^1\text{H}$ , ppm) | Isomer 7<br>( $\sigma$ $^1\text{H}$ , ppm) | Isomer 8<br>( $\sigma$ $^1\text{H}$ , ppm) |
|-------------|--------------------------------------------|--------------------------------------------|--------------------------------------------|--------------------------------------------|--------------------------------------------|--------------------------------------------|--------------------------------------------|--------------------------------------------|
| H2          | 28.72                                      | 28.73                                      | 28.70                                      | 28.68                                      | 28.59                                      | 28.67                                      | 28.76                                      | 28.55                                      |
| H2          | 28.81                                      | 28.67                                      | 28.73                                      | 28.87                                      | 28.96                                      | 28.88                                      | 28.77                                      | 28.96                                      |
| H3          | 26.78                                      | 26.71                                      | 26.76                                      | 26.64                                      | 26.69                                      | 26.70                                      | 26.69                                      | 26.73                                      |
| H5          | 25.68                                      | 25.63                                      | 25.63                                      | 25.70                                      | 25.67                                      | 25.58                                      | 25.69                                      | 25.65                                      |
| H7          | 30.19                                      | 30.09                                      | 30.20                                      | 30.14                                      | 30.07                                      | 30.13                                      | 30.05                                      | 30.06                                      |
| H8          | 29.91                                      | 29.92                                      | 29.86                                      | 29.85                                      | 29.77                                      | 29.79                                      | 29.78                                      | 29.86                                      |
| H9          | 30.35                                      | 30.47                                      | 30.33                                      | 30.64                                      | 30.51                                      | 30.42                                      | 30.43                                      | 30.56                                      |
| H9          | 30.53                                      | 30.59                                      | 30.50                                      | 29.34                                      | 30.49                                      | 30.49                                      | 30.17                                      | 30.45                                      |
| H10         | 29.63                                      | 29.67                                      | 29.61                                      | 29.55                                      | 29.63                                      | 29.62                                      | 29.57                                      | 29.59                                      |
| H11         | 26.16                                      | 26.12                                      | 25.99                                      | 25.97                                      | 26.16                                      | 26.09                                      | 26.06                                      | 26.17                                      |
| H12         | 25.65                                      | 25.68                                      | 25.66                                      | 25.69                                      | 25.73                                      | 25.65                                      | 25.68                                      | 25.64                                      |
| H13         | 29.48                                      | 29.48                                      | 29.42                                      | 29.45                                      | 29.44                                      | 29.45                                      | 29.47                                      | 29.46                                      |
| H14         | 30.60                                      | 30.59                                      | 30.59                                      | 30.59                                      | 30.57                                      | 30.57                                      | 30.58                                      | 30.57                                      |
| H15         | 29.50                                      | 29.51                                      | 29.53                                      | 29.47                                      | 29.47                                      | 29.51                                      | 29.46                                      | 29.49                                      |
| H16         | 30.48                                      | 30.48                                      | 30.49                                      | 30.48                                      | 30.47                                      | 30.49                                      | 30.47                                      | 30.47                                      |
| H17         | 29.92                                      | 30.01                                      | 29.74                                      | 30.05                                      | 30.08                                      | 29.84                                      | 29.81                                      | 30.00                                      |
| H17         | 29.92                                      | 29.77                                      | 29.90                                      | 29.98                                      | 29.80                                      | 29.78                                      | 30.08                                      | 29.99                                      |
| H18         | 30.65                                      | 30.62                                      | 30.67                                      | 30.75                                      | 30.77                                      | 30.66                                      | 30.74                                      | 30.76                                      |
| H19         | 30.68                                      | 30.67                                      | 30.71                                      | 30.80                                      | 30.59                                      | 30.71                                      | 30.76                                      | 30.59                                      |
| H20         | 30.31                                      | 30.46                                      | 30.35                                      | 30.25                                      | 30.32                                      | 30.35                                      | 30.37                                      | 30.46                                      |
| H20         | 30.44                                      | 30.29                                      | 30.34                                      | 30.30                                      | 30.43                                      | 30.33                                      | 30.31                                      | 30.35                                      |
| H21         | 30.74                                      | 30.76                                      | 30.71                                      | 30.72                                      | 30.79                                      | 30.73                                      | 30.75                                      | 30.74                                      |

## References:

- <sup>1</sup> *Spartan '10. Version 1.1.0*, Wavefunction Inc., Irvine, CA, **2011**.
- <sup>2</sup> G. M. J. Frisch, W. Trucks, H. B. Schlegel, G. E. Scuseria, M. A. Robb, J. R. Cheeseman, G. Scalmani, V. Barone, B. Mennucci, G. A. Petersson, H. Nakatsuji, M. Caricato, X. Li, H. P. Hratchian, A. F. Izmaylov, J. Bloino, G. Zheng, J. L. Sonnenberg, M. J. Frisch, G. W. Trucks, H. B. Schlegel, G. E. Scuseria, M. A. Robb, G. Cheeseman, J. R. Scalmani, V. Barone, B. Mennucci, H. Petersson, G. A. Nakatsuji, M. Caricato, X. Li, H. P. Hratchian, A. F. Izmaylov, J. Bloino, G. Zheng, J. L. Sonnenberg, K. Hada, M. Ehara, M. Toyota, R. Fukuda, J. Hasegawa, M. Ishida, T. Nakajima, Y. Honda, O. Kitao, H. Nakai, T. Vreven, J. E. Montgomery, J. A. Peralta Jr., F. Ogliaro, M. Bearpark, J. J. Heyd, E. Brothers, K. N. Kudin, R. Staroverov, V. N. Kobayashi, K. Normand, J. Raghavachari, A. Rendell, J. C. Burant, S. S. Iyengar, J. Tomasi, M. Cossi, N. Rega, J. M. Millam, M. Klene, J. E. Knox, J. B. Cross, V. Bakken, C. Adamo, J. Jaramillo, R. Gomperts, R. E. Stratmann, O. Yazyev, A. J. Austin, R. Cammi, C. Pomelli, J. W. Ochterski, R. L. Martin, K. Morokuma, V. G. Zakrzewski, G. A. Voth, P. Salvador, S. Dannenberg, J. J. Dapprich, A. D. Daniels, Ö. Farkas, J. B. Foresman, J. V. Ortiz, J. Cioslowski and D. J. Fox, *Gaussian 09, Revision E. 01*, Gaussian, 2009.
- <sup>3</sup> N. Grimblat, M. M. Zanardi and A. M. Sarotti, Beyond DP4: An Improved Probability for the Stereochemical Assignment of Isomeric Compounds using Quantum Chemical Calculations of NMR Shifts, *J. Org. Chem.*, 2015, **80**, 12526–12534.
- <sup>4</sup> M. M. Zanardi and A. M. Sarotti, GIAO C-H COSY Simulations Merged with Artificial Neural Networks Pattern Recognition Analysis. Pushing the Structural Validation a Step Forward, *J. Org. Chem.*, 2015, **80**, 9371–9378.
- <sup>5</sup> S. P. Gunasekera, M. Gunasekera, G. P. Gunawardana, P. McCarthy and N. Burres, two new bioactive cyclic peroxides from the marine sponge *Plakortis angulospiculatus*, *J. Nat. Prod.*, 1990, **53**, 669-674.
- .
